# Supplementary material
Source: publisher figshare collection journal article supplement (https://karger.figshare.com/ndownloader/files/28746468)
Supplement: Supplementary file 1 [file 28746468]

**Suppl. Fig. S1: Clinical characterisation of the study group according to the HPO system (61 patients, absolute numbers)**. Assignment was performed using HPO (Human Phenotype Ontology) terms. Percentage of number of probands with HPO term in subclasses.

**Suppl. Fig. S2: Pairwise positive correlations of HPO subclasses in patients with a genetic finding.** The thickness and transparency of the connecting lines reflect the degree of correlation between the respective phenotypes (coefficient r).
